# Supplementary material
Source: PubMed Central journal article supplement (PMC6483001)
Supplement: jciinsight-4-125476-s085.pdf [file jciinsight-4-125476-s085.pdf]

**Supplemental Figures and tables for: Skin Cancer Precursor Immunotherapy for Squamous  
Cell Carcinoma Prevention**

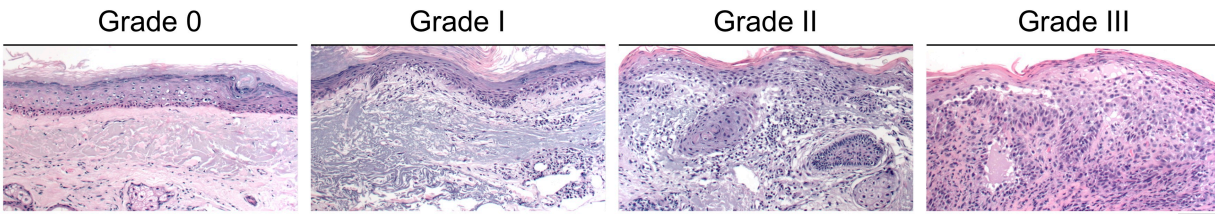

**Cutaneous Inflammation Grades**

**Grade 0:** No or rare inflammatory infiltrates.

**Grade I:** Mild perivascular immune cell infiltrate. No involvement of the overlying epidermis.

**Grade II:** Moderate-to-severe perivascular inflammation with or without mild epidermal and/or adnexal involvement (limited to spongiosis and exocytosis). No epidermal dyskeratosis or apoptosis.

**Grade III:** Dense inflammation and epidermal involvement (significant spongiosis and exocytosis) with epithelial apoptosis, dyskeratosis and/or keratinolysis.

**Supplemental Figure 1. Cutaneous inflammation grading system.** The magnitude of T cell immunity in the AK biopsies obtained one day after treatment completion is measured by the criteria used for skin graft rejection (1-3). Representative histological images of AKs that correspond to each grade are shown.

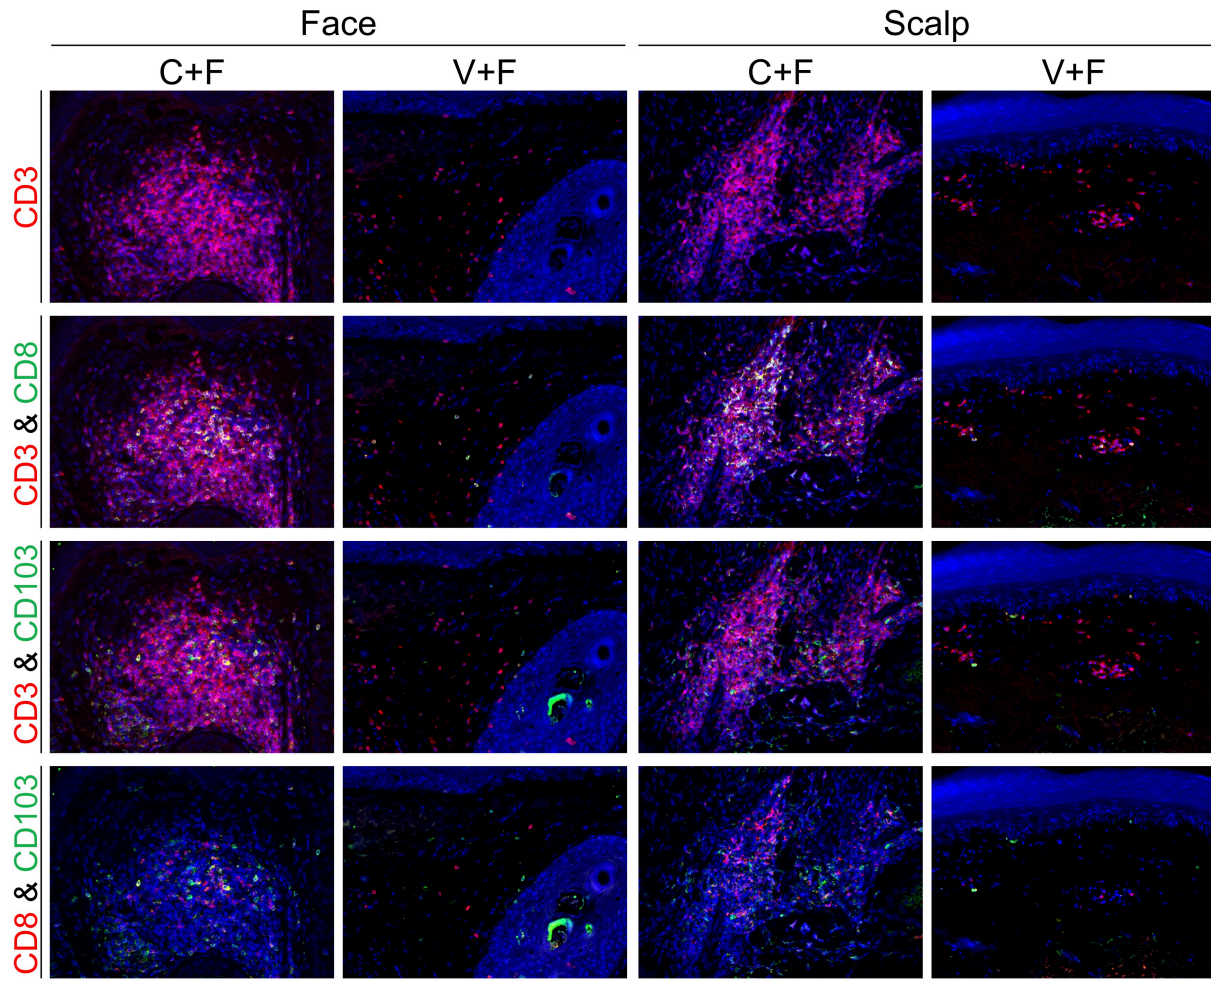

**Supplemental Figure 2. CD8<sup>+</sup> T cell accumulation and CD8<sup>+</sup> T<sub>RM</sub> induction in AKs treated with calcipotriol plus 5-FU.** Representative images of CD3/CD8/CD103-stained AKs on the face and scalp biopsied one day after treatment with calcipotriol plus 5-FU (C+F) or Vaseline plus 5-FU (V+F) are shown (scale bar: 100  $\mu$ m).

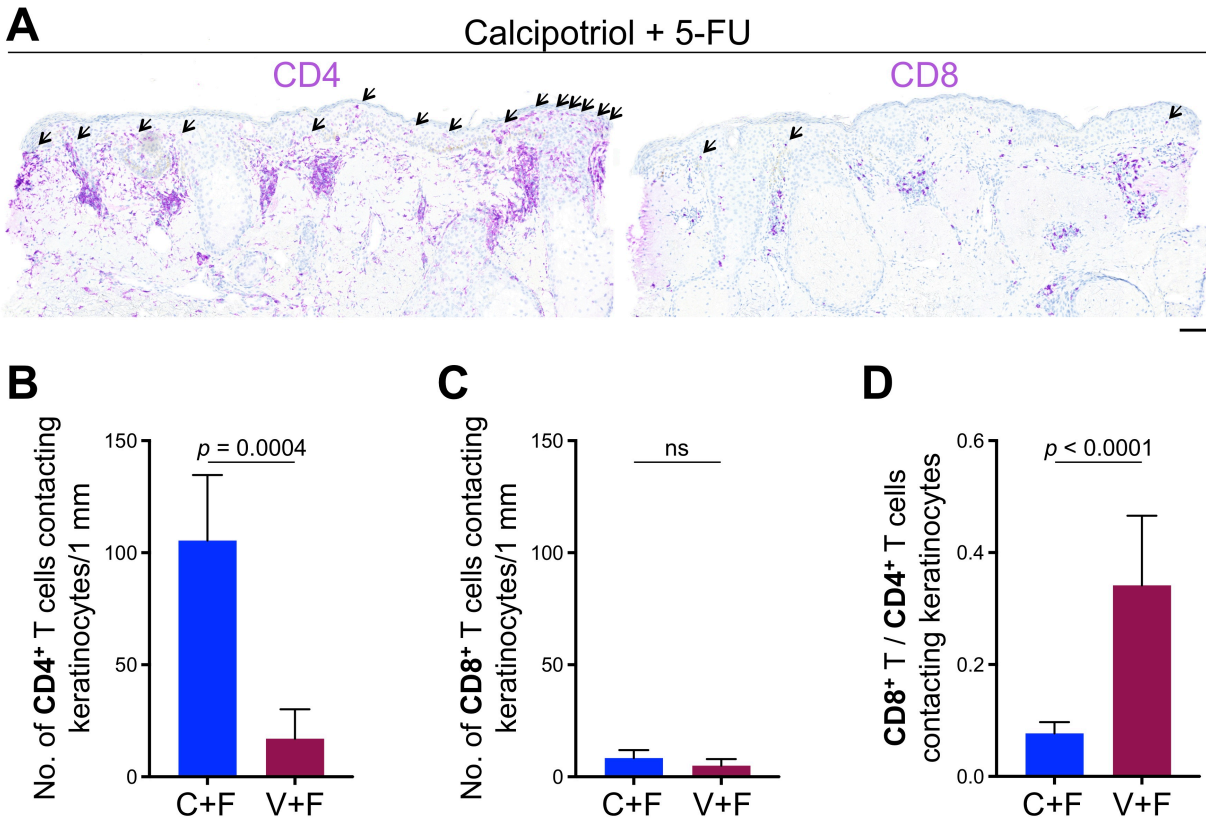

**Supplemental Figure 3. CD4<sup>+</sup> T and CD8<sup>+</sup> T cell localization in AKs treated with calcipotriol plus 5-FU.** (A) Representative images of CD4-stained or CD8-stained adjacent sections from an AK on the face treated with calcipotriol plus 5-FU combination are shown (arrows point to T cells contacting the premalignant keratinocytes, scale bar: 100  $\mu$ m). Compared to CD4<sup>+</sup> T cells, note the low density of CD8<sup>+</sup> T cell infiltrates in the AK, which are mostly localized in the dermis and around the dermal blood vessels. (B) The number of CD4<sup>+</sup> T cells contacting epidermal keratinocytes in AKs are compared after treatment with calcipotriol plus 5-FU (C+F) versus Vaseline plus 5-FU (V+F). (C) The number of CD8<sup>+</sup> T cells contacting epidermal keratinocytes in AKs after calcipotriol plus 5-FU (C+F) versus Vaseline plus 5-FU (V+F) treatment are shown. (D) Bar graph shows the ratio of CD8<sup>+</sup> T cells to CD4<sup>+</sup> T cells contacting the AK keratinocytes in the test (C+F) and control (V+F) groups. The number of cells were counted across the length of the AK punch biopsy specimens obtained from face and scalp. The cell counts are presented per 1 mm length of the epidermis ( $n = 3$  per group, ns: not significant by Wilcoxon rank-sum test).

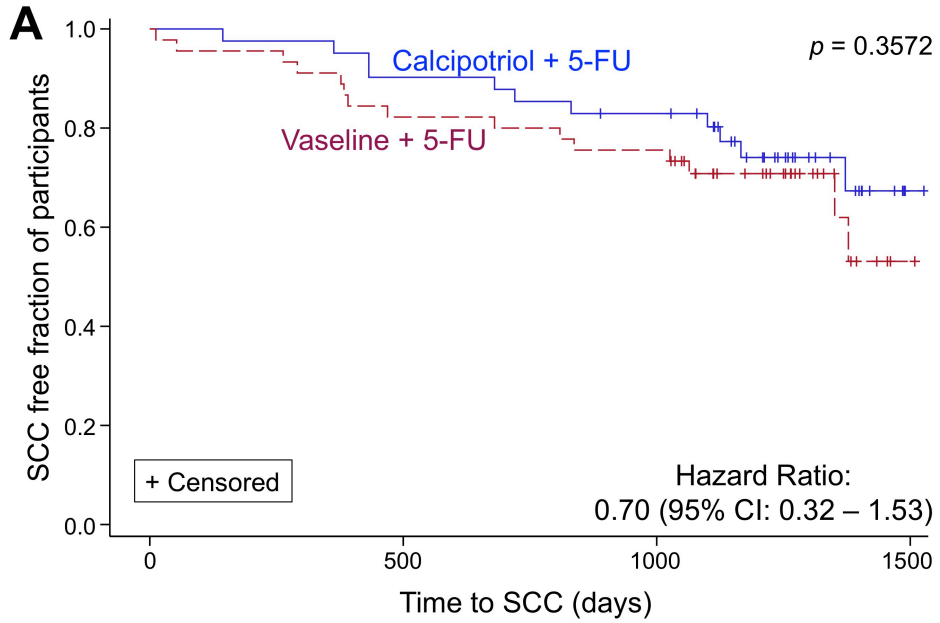

| No. at risk         | 0yr | 1yr | 2yr | 3yr |
|---------------------|-----|-----|-----|-----|
| Calcipotriol + 5-FU | 41  | 39  | 35  | 33  |
| Vaseline + 5-FU     | 45  | 41  | 36  | 32  |

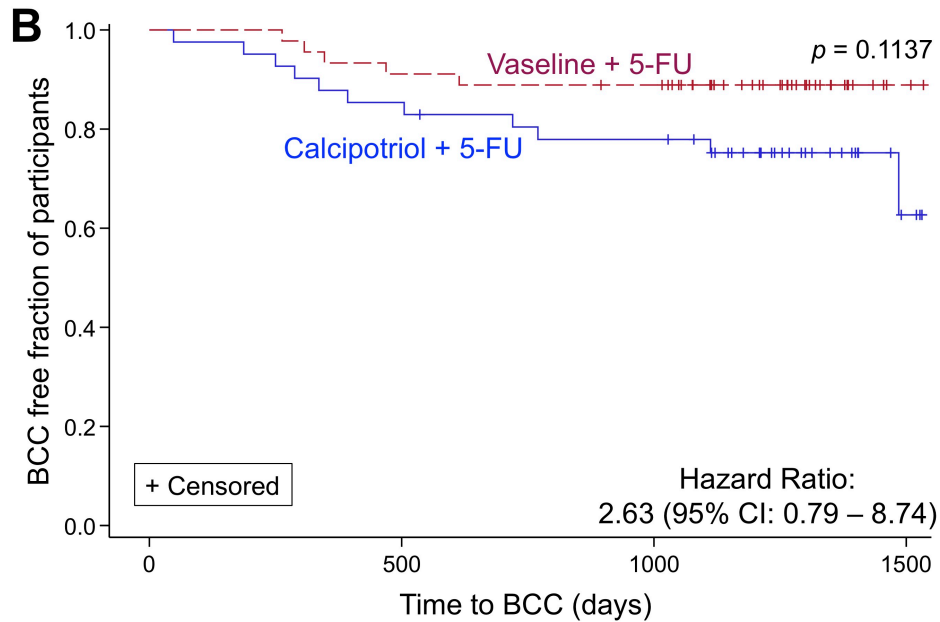

| No. at risk         | 0yr | 1yr | 2yr | 3yr |
|---------------------|-----|-----|-----|-----|
| Calcipotriol + 5-FU | 41  | 36  | 32  | 31  |
| Vaseline + 5-FU     | 45  | 42  | 40  | 40  |

**Supplemental Figure 4. Proportion of participants remaining free of SCC and BCC on any treated anatomical sites over time.** Kaplan-Meier curves show the proportion of participants in the test and control group who remained (A) SCC and (B) BCC free on all their treated anatomical

sites during the >1500 days of follow-up after trial.

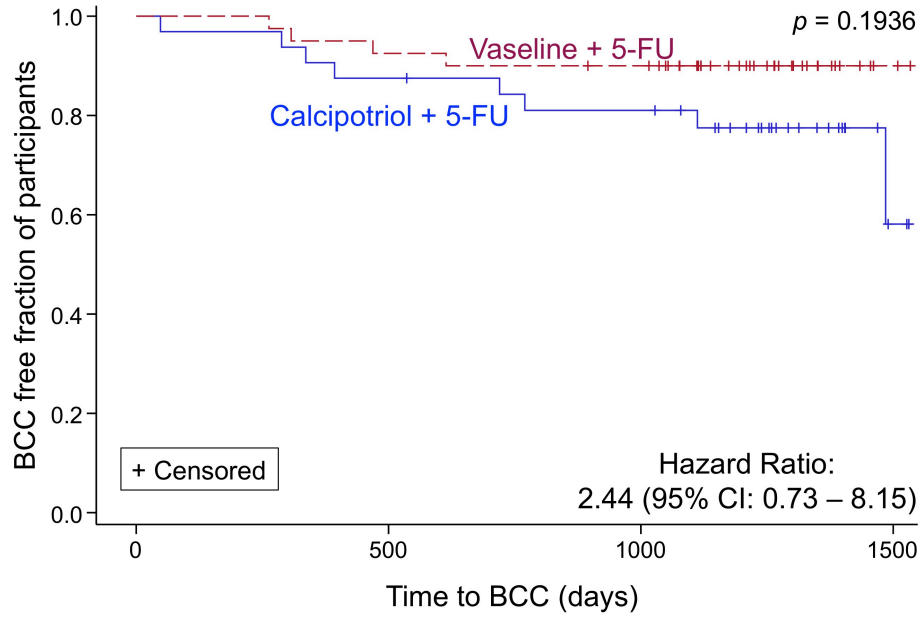

| No. at risk         | 0yr | 1yr | 2yr | 3yr |
|---------------------|-----|-----|-----|-----|
| Calcipotriol + 5-FU | 32  | 29  | 26  | 25  |
| Vaseline + 5-FU     | 40  | 38  | 36  | 36  |

**Supplemental Figure 5. Proportion of participants remaining BCC free on the treated face and scalp over time.** Kaplan-Meier analysis shows the follow-up period of over >1500 days after trial.

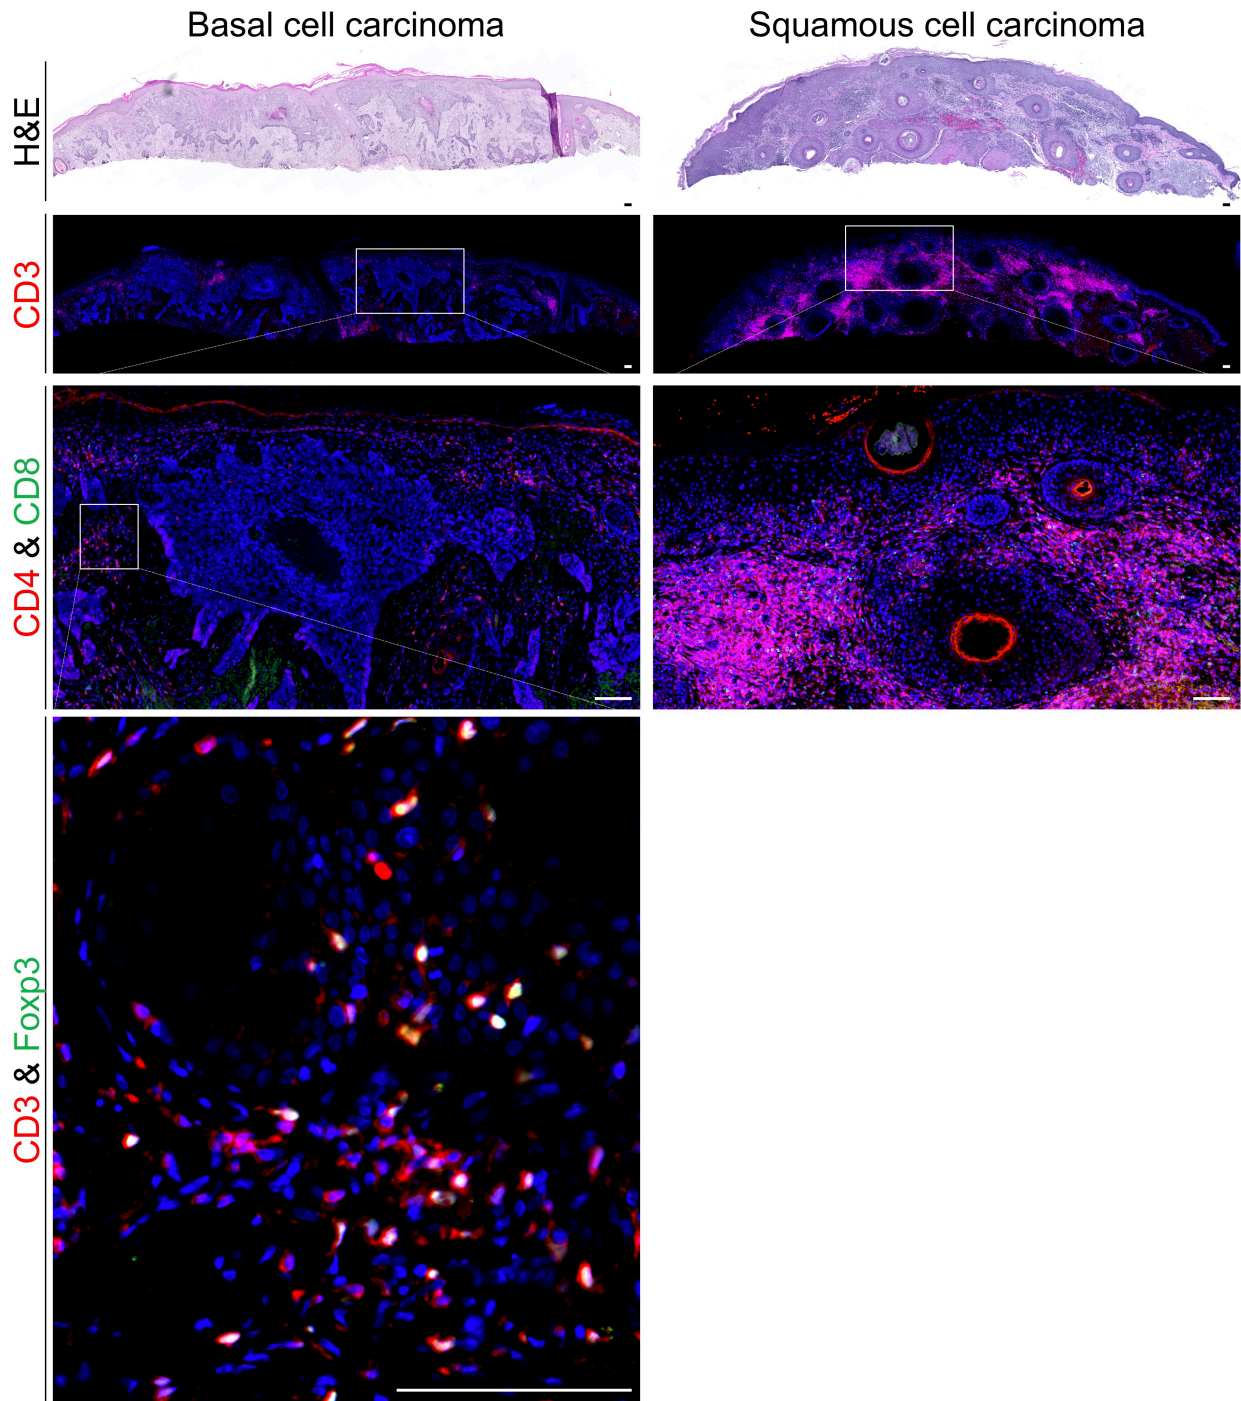

**Supplemental Figure 6. Differential immune microenvironments in BCC and SCC biopsied from the face of the same participant at a clinical visit after trial.** H&E images depict the two KCs, a BCC and a SCC. Staining with CD3, CD4, CD8, and Foxp3 illustrates large T cell infiltrates in the SCC. In contrast, there is minimal T cell infiltrate at the periphery of the BCC, largely composed of immunosuppressive Foxp3<sup>+</sup> regulatory T cells. Scale bars: 100µm.



CD4 & CD8

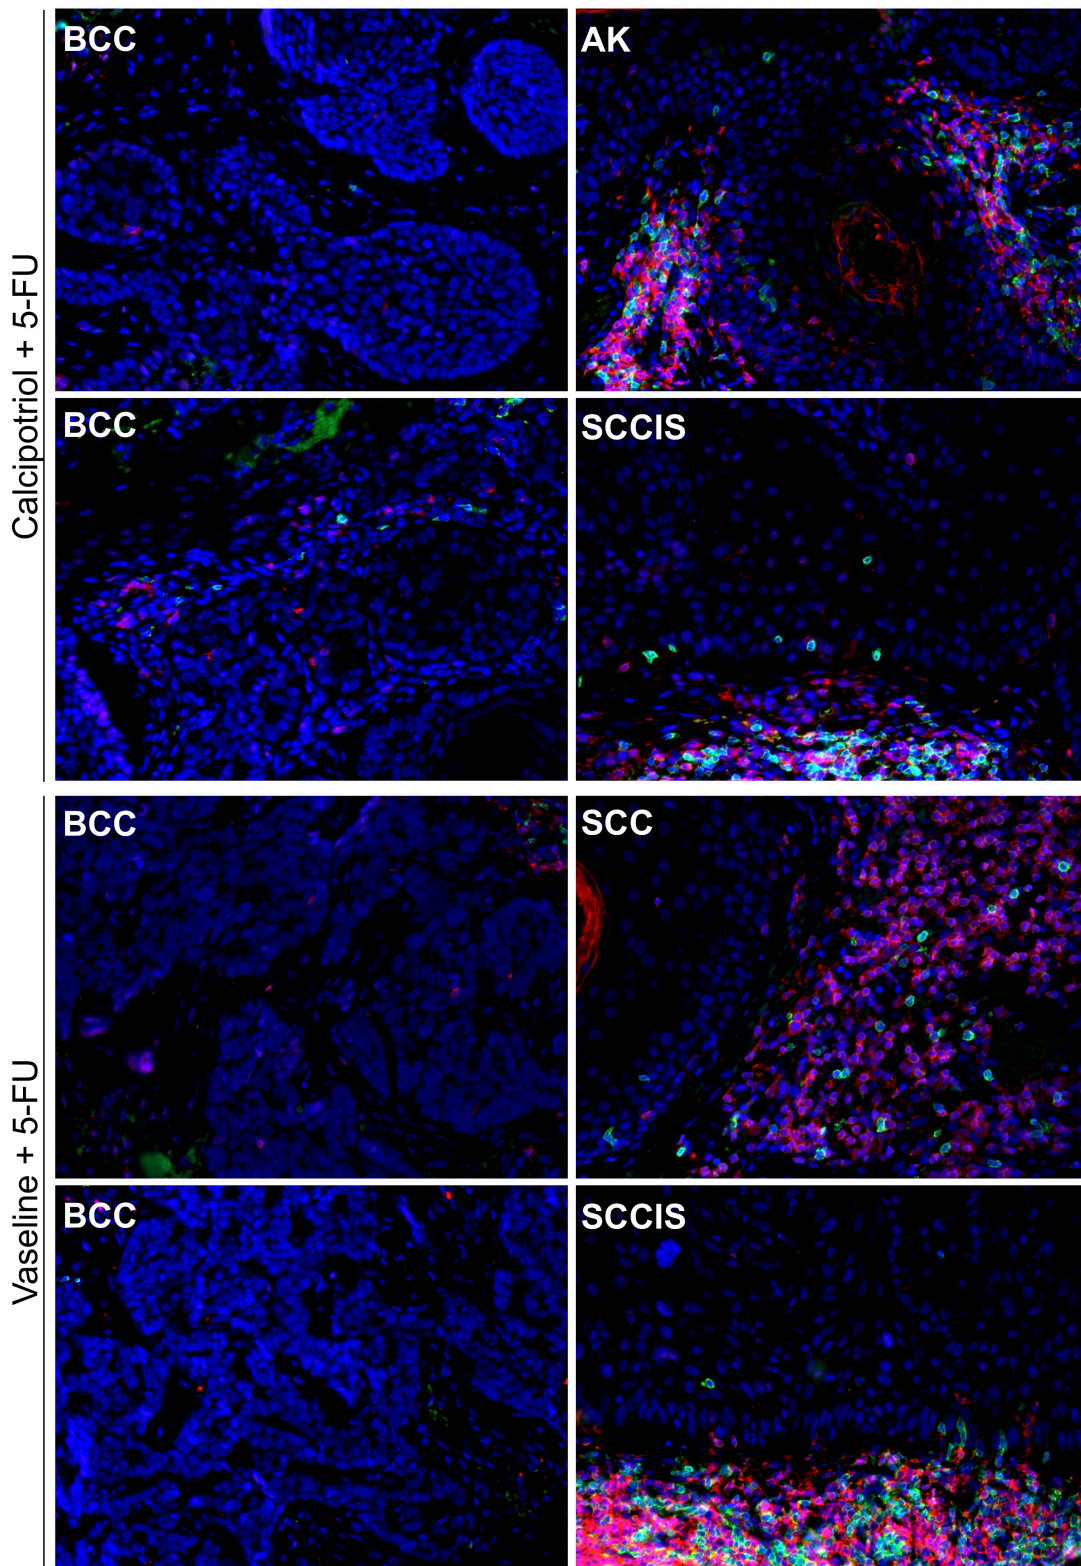

**Supplemental Figure 7. Differential immune microenvironments in BCC and AK-SCC spectrum lesions biopsied from the face and scalp of participants post-trial.** KC biopsies from two participants in each treatment groups were stained for CD4<sup>+</sup> and CD8<sup>+</sup> T cells illustrating the magnitude of tumor infiltrating lymphocytes in BCCs compared to AK, SCCIS or SCC from the same participants. Each row represents KCs from a single participant. Scale bar: 100µm.

Calcipotriol + 5-FU

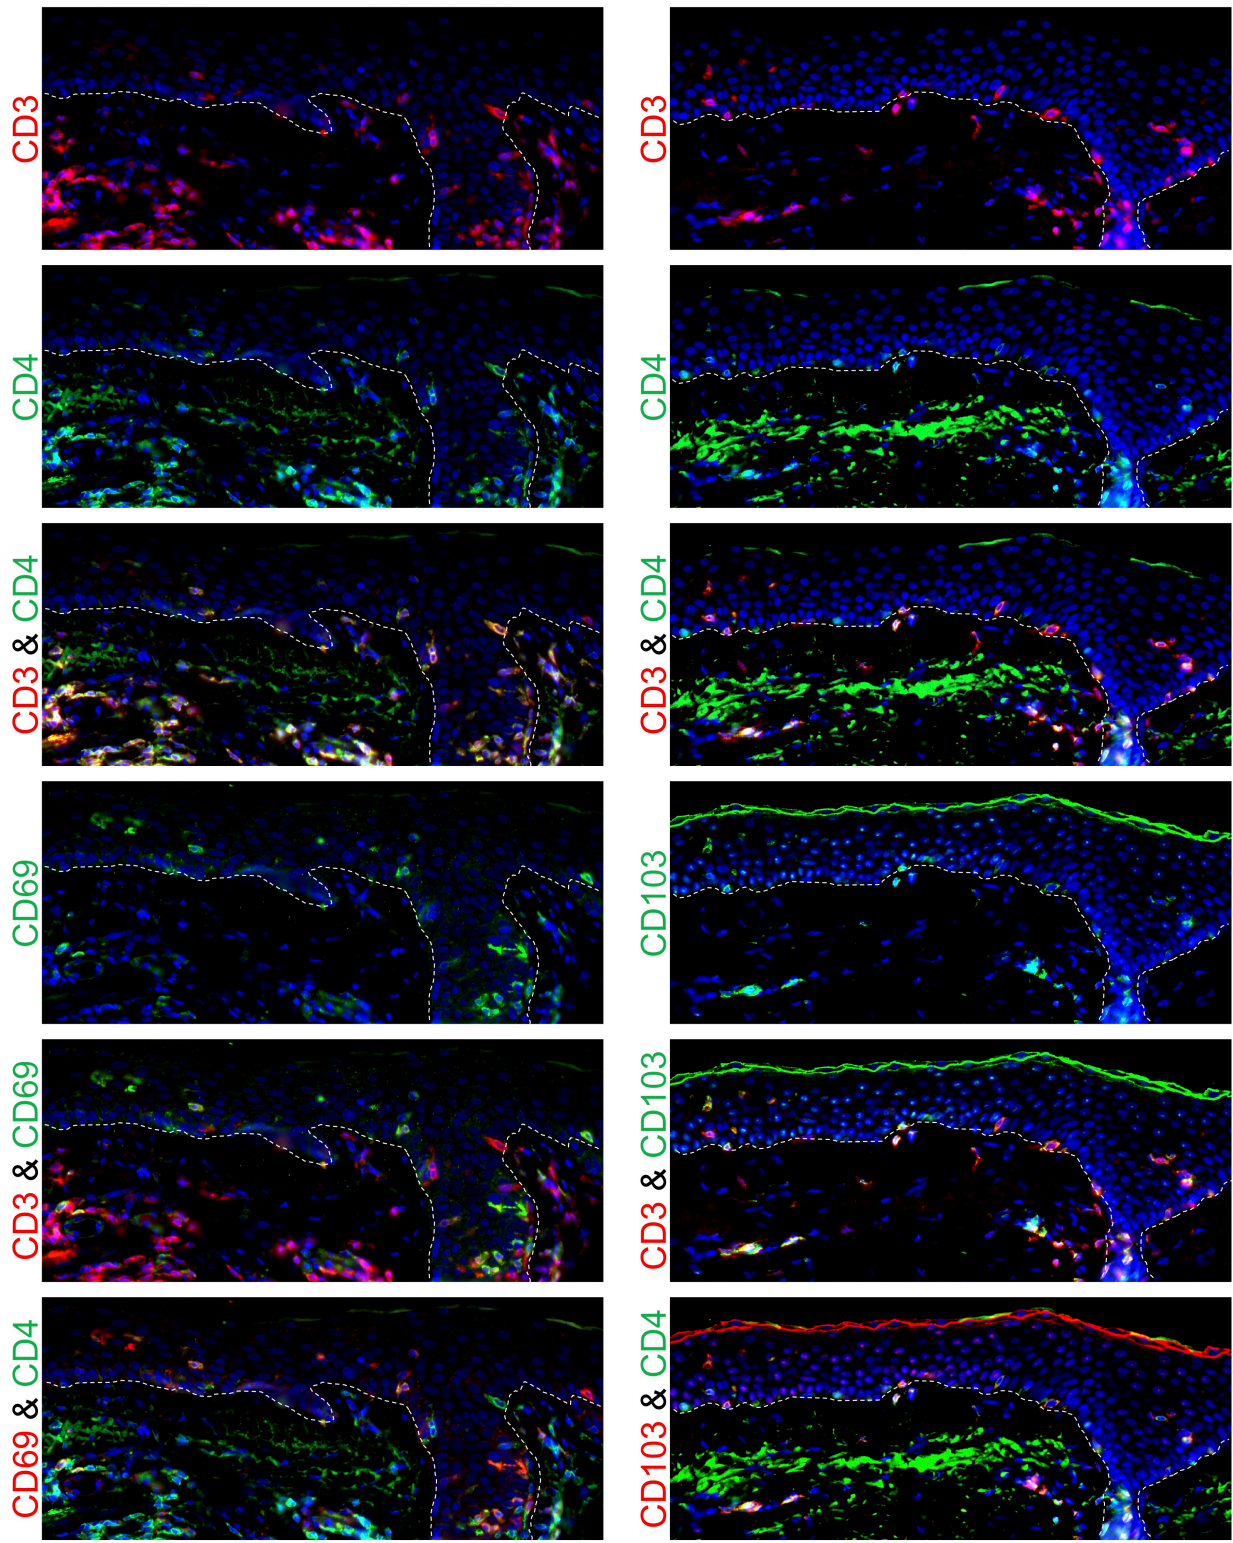

**Supplemental Figure 8. T<sub>RM</sub> surface marker expression in epidermal T cells.** Representative image of normal skin from a post-trial biopsy specimen that was collected from a participant in the calcipotriol plus 5-FU treatment group is shown with staining for CD3/CD4/CD69 and CD3/CD4/CD103 (dashed lines highlight the basement membrane, scale bar: 100  $\mu$ m).

**Supplemental Table 1. Baseline demographic and clinical characteristics of participants treated on the face and scalp.**

|                                                                                | <u>Calcipotriol + 5-FU</u> | <u>Vaseline + 5-FU</u> | <u>P value</u> |
|--------------------------------------------------------------------------------|----------------------------|------------------------|----------------|
|                                                                                | (n=32)                     | (n=40)                 |                |
| <b>Age, mean (SD), y</b>                                                       | 67 (7)                     | 70 (8)                 | 0.186          |
| (Range)                                                                        | (56-81)                    | (52-84)                |                |
| <b>Gender, n (%)</b>                                                           |                            |                        | 0.451          |
| <b>Male</b>                                                                    | 25 (78)                    | 34 (85)                |                |
| <b>Female</b>                                                                  | 7 (22)                     | 6 (15)                 |                |
| <b># Anatomical Sites Treated, n (%)</b>                                       |                            |                        |                |
| <b>Face</b>                                                                    | 26 (81)                    | 34 (85)                | 0.671          |
| <b>Scalp</b>                                                                   | 18 (56)                    | 24 (60)                | 0.748          |
| <b>Baseline AK Count on Each Anatomical Site, median (interquartile range)</b> |                            |                        |                |
| <b>Face</b>                                                                    | 18 (11)                    | 15 (12)                | <b>0.046</b>   |
| <b>Scalp</b>                                                                   | 23 (17)                    | 21 (22)                | 0.565          |
| <b>RUE</b>                                                                     | 13 (14)                    | 17 (29)                | 0.354          |
| <b>LUE</b>                                                                     | 12 (9)                     | 11 (22)                | 0.797          |
| <b>Skin Type, no. (%)</b>                                                      |                            |                        | 0.154          |
| <b>I</b>                                                                       | 5 (16)                     | 13 (33)                |                |
| <b>II</b>                                                                      | 22 (69)                    | 23 (58)                |                |
| <b>III</b>                                                                     | 5 (16)                     | 4 (10)                 |                |
| <b>Follow-up before trial, mean (SD), d</b>                                    | 659 (477)                  | 815 (382)              | 0.126          |
| (Range)                                                                        | (8-1366)                   | (24-1331)              |                |
| <b>Follow-up after trial, mean (SD), d</b>                                     | 1288 (200)                 | 1255 (143)             | 0.403          |
| (Range)                                                                        | (536-1531)                 | (1016-1534)            |                |
| <b>History of BCC before trial, n (%)</b>                                      |                            |                        | 0.829          |

|                                                             |         |              |
|-------------------------------------------------------------|---------|--------------|
| <b>0</b>                                                    | 20 (63) | 24 (60)      |
| <b>≥1</b>                                                   | 12 (38) | 16 (40)      |
| <b>History of SCC before trial, <i>n</i> (%)</b>            |         |              |
|                                                             |         | <i>0.826</i> |
| <b>0</b>                                                    | 20 (63) | 26 (65)      |
| <b>≥1</b>                                                   | 12 (38) | 14 (35)      |
| <b>History of KC before trial, <i>n</i> (%)</b>             |         |              |
|                                                             |         | <i>0.711</i> |
| <b>0</b>                                                    | 15 (47) | 17 (43)      |
| <b>≥1</b>                                                   | 17 (53) | 23 (58)      |
| <b>History of 5-FU treatment before trial, <i>n</i> (%)</b> |         |              |
|                                                             |         | <i>0.203</i> |
| <b>0</b>                                                    | 23 (72) | 23 (58)      |
| <b>≥1</b>                                                   | 9 (28)  | 17 (43)      |
| <b>History of PDT treatment before trial, <i>n</i> (%)</b>  |         |              |
|                                                             |         | <i>0.870</i> |
| <b>0</b>                                                    | 19 (59) | 27 (68)      |
| <b>≥1</b>                                                   | 13 (41) | 13 (33)      |

5-FU, 5-fluorouracil; RUE, right upper extremity; LUE, left upper extremity; AK, actinic keratosis; BCC, basal cell carcinoma; SCC, squamous cell carcinoma; KC, keratinocyte cancer; PDT, photodynamic therapy.

Supplemental Table 2. AK treatments that participants received after clinical trial.

|                                                            | <u>Calcipotriol + 5-FU</u> | <u>Vaseline + 5-FU</u> | <u>P value</u> |
|------------------------------------------------------------|----------------------------|------------------------|----------------|
|                                                            | (n=41)                     | (n=45)                 |                |
| <b>Frequency of cryotherapy on any location, mean (SD)</b> |                            |                        |                |
|                                                            | 26 (24)                    | 22 (21)                | 0.327          |
| <b>5-FU monotherapy on any treated location, n (%)</b>     |                            |                        |                |
| 0                                                          | 23 (56)                    | 23 (51)                | 0.643          |
| ≥1                                                         | 18 (44)                    | 22 (49)                |                |
| <b>5-FU monotherapy on treated face or scalp, n (%)</b>    |                            |                        |                |
| 0                                                          | 17 (53)                    | 20 (50)                | 0.792          |
| ≥1                                                         | 15 (47)                    | 20 (50)                |                |
| <b>PDT on any treated location n (%)</b>                   |                            |                        | 0.614          |
| 0                                                          | 29 (71)                    | 34 (76)                |                |
| ≥1                                                         | 12 (29)                    | 11 (24)                |                |
| <b>PDT on treated face or scalp, n (%)</b>                 |                            |                        |                |
| 0                                                          | 21 (66)                    | 31 (78)                | 0.264          |
| ≥1                                                         | 11 (34)                    | 9 (23)                 |                |
| <b>Field treatment on any treated location, n (%)</b>      |                            |                        | 0.607          |
| 0                                                          | 13 (32)                    | 12 (27)                |                |
| ≥1                                                         | 28 (68)                    | 33 (73)                |                |
| <b>Field treatment on treated face or scalp, n (%)</b>     |                            |                        | 0.556          |
| 0                                                          | 10 (31)                    | 10 (25)                |                |
| ≥1                                                         | 22 (69)                    | 30 (75)                |                |

5-FU, 5-fluorouracil. PDT, photodynamic therapy.

**Supplemental Table 3. Cancer outcomes on all the treated anatomical sites.**

|                | <b>Calcipotriol + 5-FU</b>                      | <b>Vaseline + 5-FU</b>                          | <b>Hazard Ratio</b>      | <b>P Value</b> |
|----------------|-------------------------------------------------|-------------------------------------------------|--------------------------|----------------|
| Type of lesion | Participants With $\geq 1$ Lesion, <i>n</i> (%) | Participants With $\geq 1$ Lesion, <i>n</i> (%) | HR (95% CI)              |                |
| <b>Year 1</b>  |                                                 |                                                 |                          |                |
| <b>KC</b>      | 7 of 41 (17)                                    | 6 of 45 (13)                                    | 1.306<br>(0.439 - 3.886) | 0.766          |
| <b>BCC</b>     | 5 of 41 (12)                                    | 3 of 45 (7)                                     | 1.930<br>(0.461 - 8.075) | 0.470          |
| <b>SCC</b>     | 2 of 41 (5)                                     | 4 of 45 (9)                                     | 0.531<br>(0.097 - 2.897) | 0.678          |
| <b>Year 2</b>  |                                                 |                                                 |                          |                |
| <b>KC</b>      | 12 of 40 (30)                                   | 12 of 45 (27)                                   | 1.034<br>(0.456 - 2.343) | 1.000          |
| <b>BCC</b>     | 8 of 40 (20)                                    | 5 of 45 (11)                                    | 1.921<br>(0.628 - 5.871) | 0.367          |
| <b>SCC</b>     | 5 of 40 (13)                                    | 9 of 45 (20)                                    | 0.577<br>(0.193 - 1.722) | 0.395          |
| <b>Year 3</b>  |                                                 |                                                 |                          |                |
| <b>KC</b>      | 16 of 39 (41)                                   | 15 of 45 (33)                                   | 0.837<br>(0.384 - 1.822) | 0.644          |
| <b>BCC</b>     | 8 of 39 (21)                                    | 5 of 45 (11)                                    | 1.951<br>(0.638 - 5.965) | 0.365          |
| <b>SCC</b>     | 6 of 39 (15)                                    | 13 of 45 (29)                                   | 0.488<br>(0.186 - 1.285) | 0.193          |

5-FU, 5-fluorouracil; KC, keratinocyte cancer; BCC, basal cell carcinoma; SCC, squamous cell carcinoma.



References:

1. Lian CG, Bueno EM, Granter SR, Laga AC, Saavedra AP, Lin WM, et al. Biomarker evaluation of face transplant rejection: association of donor T cells with target cell injury. *Modern pathology : an official journal of the United States and Canadian Academy of Pathology, Inc.* 2014;27(6):788-99.
2. Cendales LC, Kanitakis J, Schneeberger S, Burns C, Ruiz P, Landin L, et al. The Banff 2007 working classification of skin-containing composite tissue allograft pathology. *American journal of transplantation : official journal of the American Society of Transplantation and the American Society of Transplant Surgeons.* 2008;8(7):1396-400.
3. Cunningham TJ, Tabacchi M, Eliane JP, Tuchayi SM, Manivasagam S, Mirzaalian H, et al. Randomized trial of calcipotriol combined with 5-fluorouracil for skin cancer precursor immunotherapy. *The Journal of clinical investigation.* 2017;127(1):106-16.
